# Supplementary figures and images for: A potent voltage-gated calcium channel inhibitor engineered from a nanobody targeted to auxiliary CaVβ subunits
Source: eLife journal article supplement (doi:10.7554/elife.49253), 2019-08-12

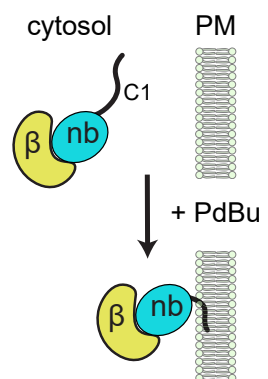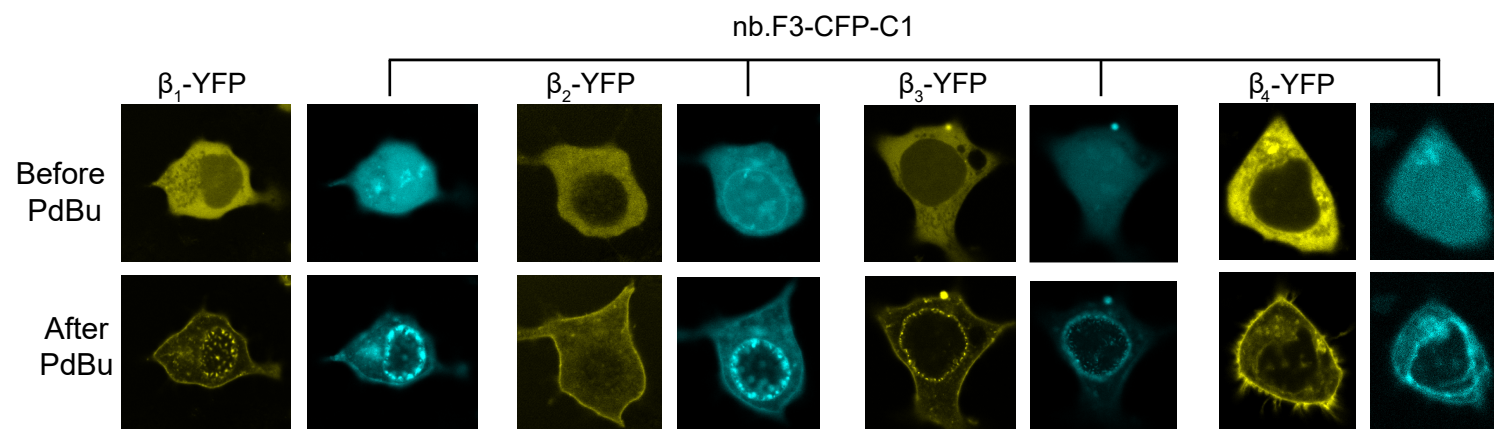

Supplement: supp [file elife_poa_e49253_Figure_1_figure_supplement_1.pdf › elife_poa_e49253_Figure_1_figure_supplement_1.pdf]

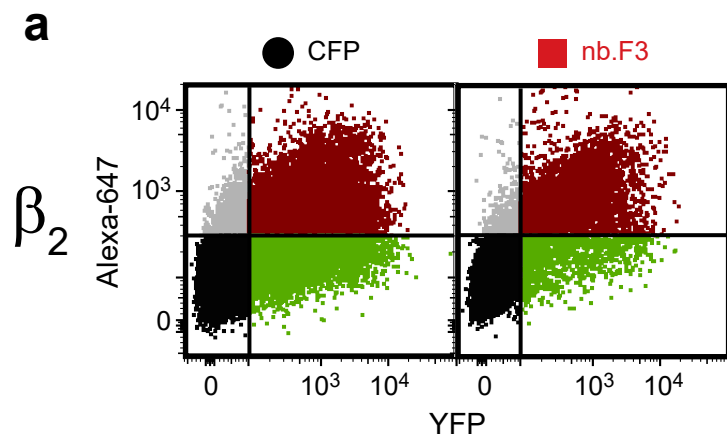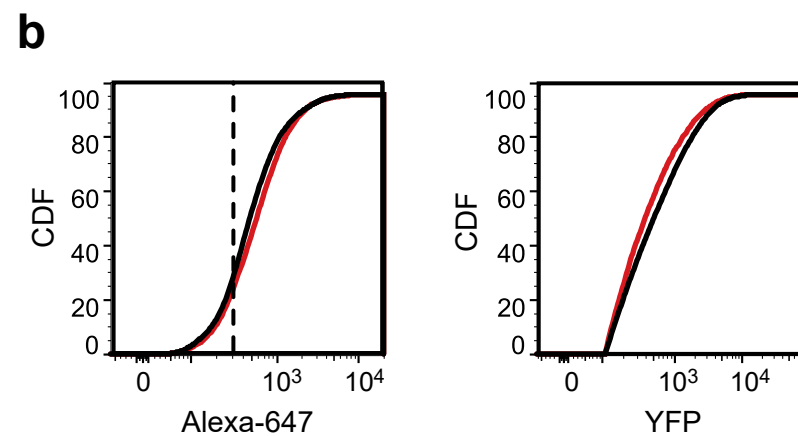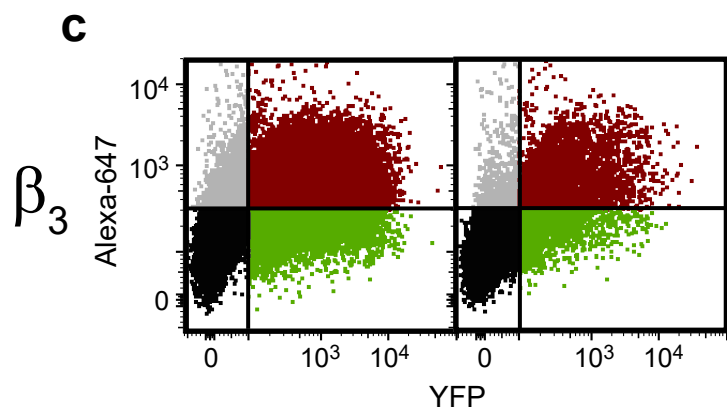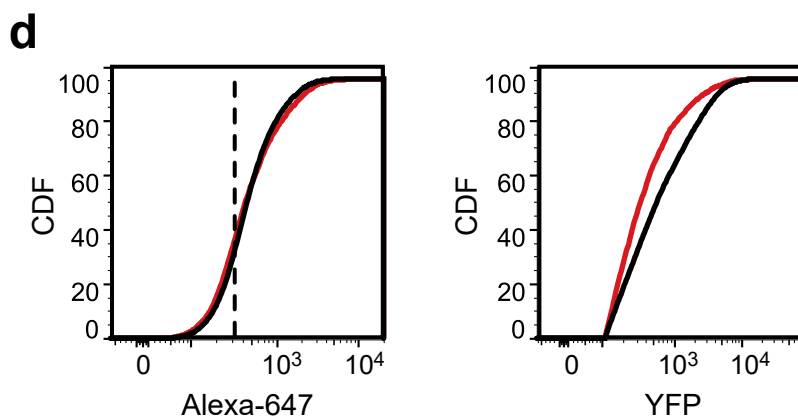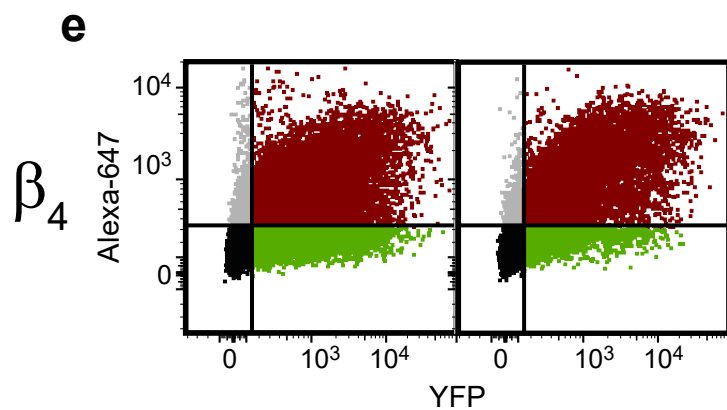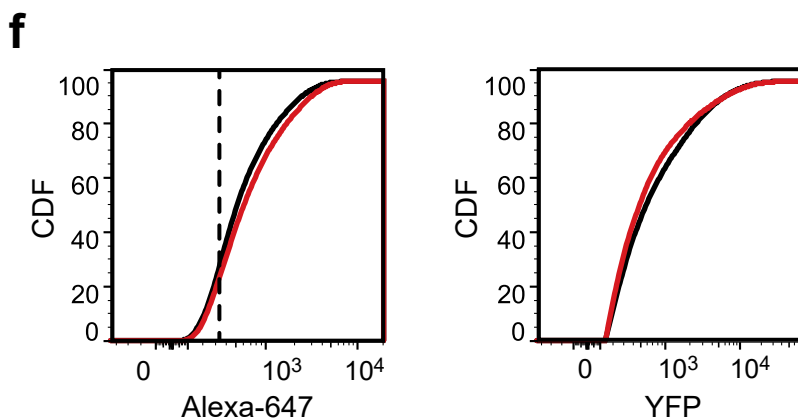

Supplement: supp [file elife_poa_e49253_Figure_2_figure_supplement_1.pdf › elife_poa_e49253_Figure_2_figure_supplement_1.pdf]

**a**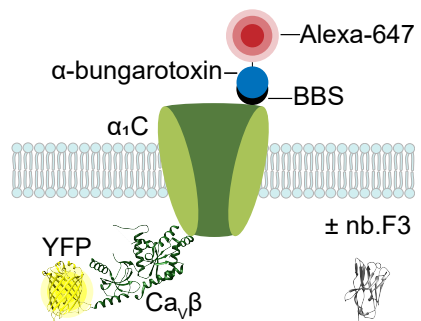**b**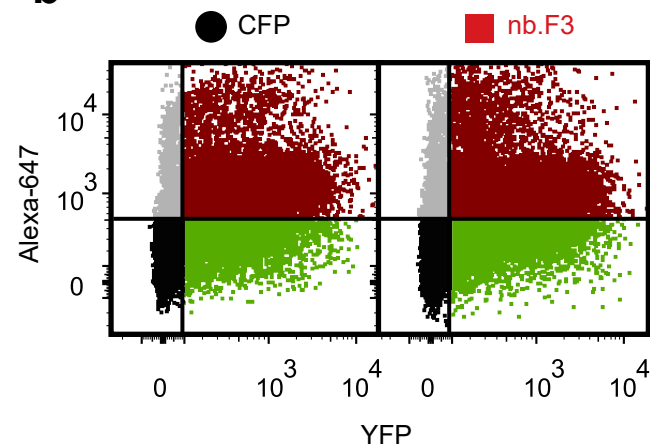**c**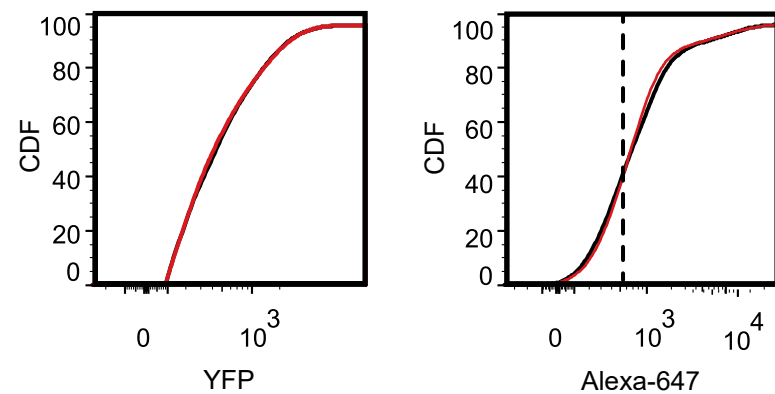**d**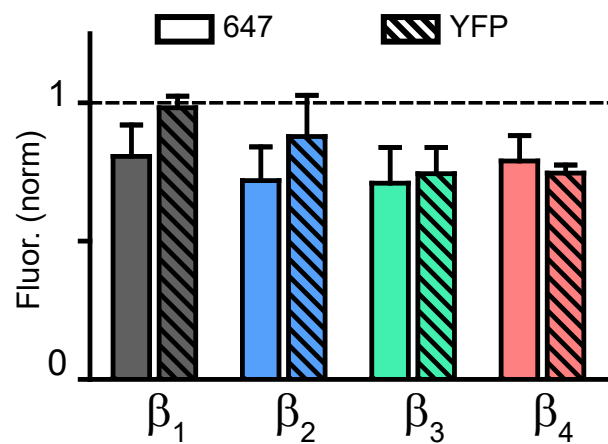**e**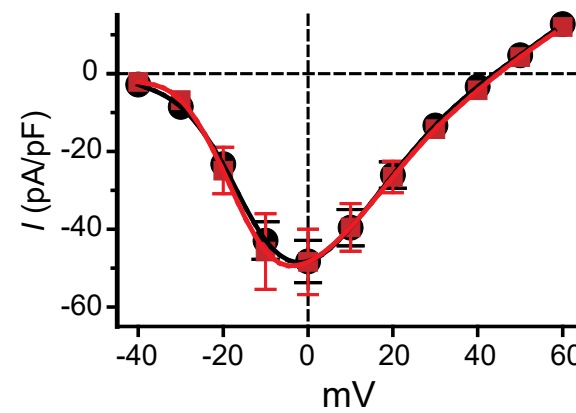

Supplement: supp [file elife_poa_e49253_Figure_2_figure_supplement_2.pdf › elife_poa_e49253_Figure_2_figure_supplement_2.pdf]

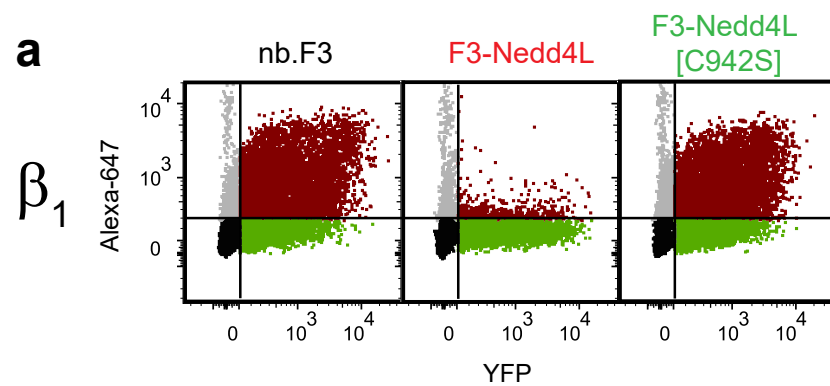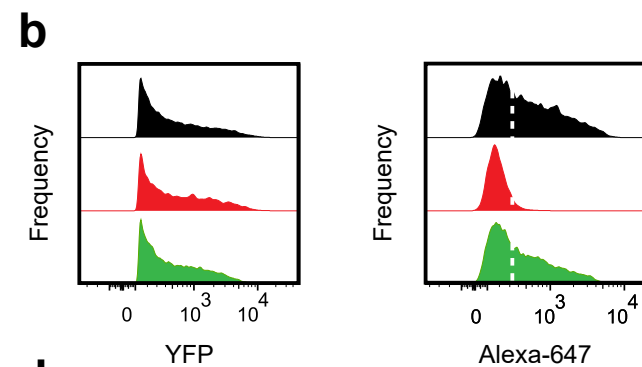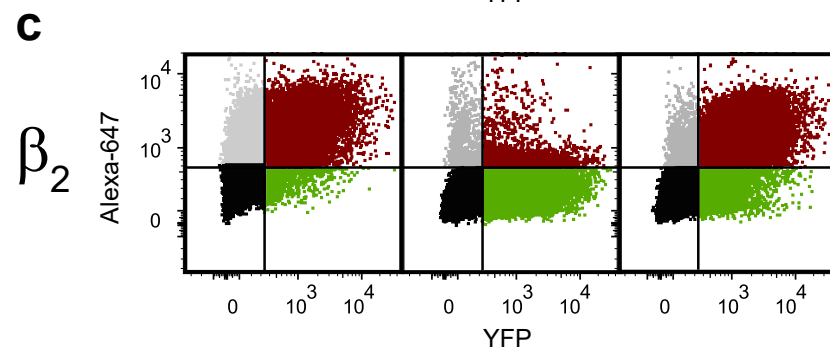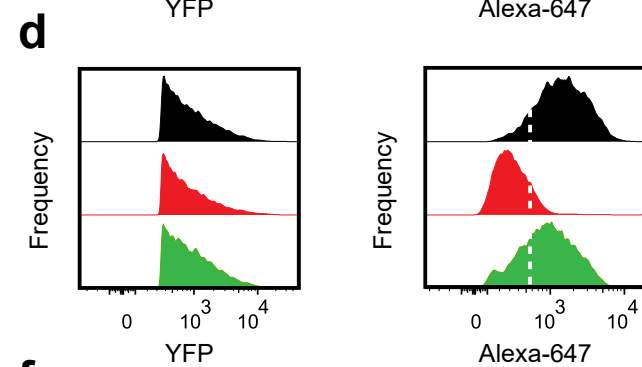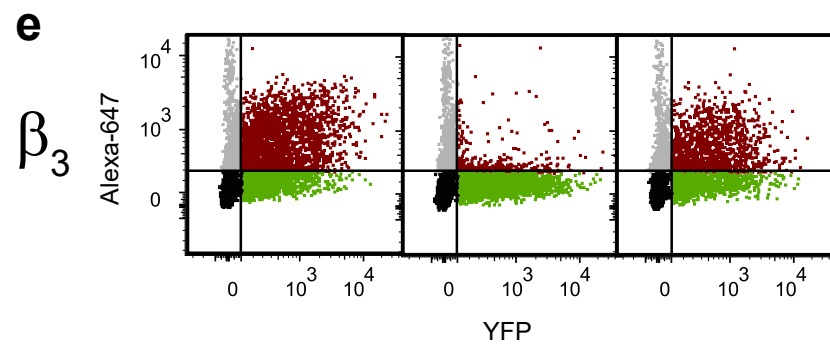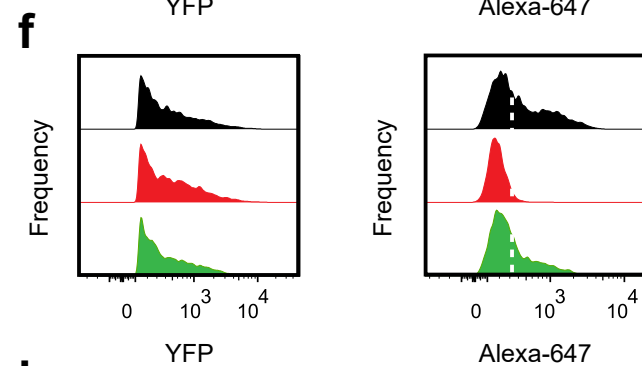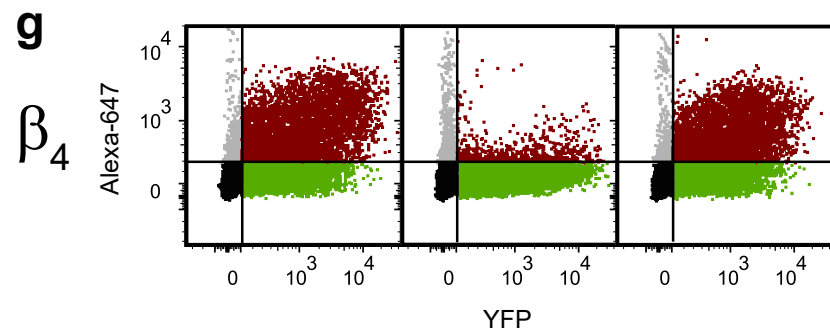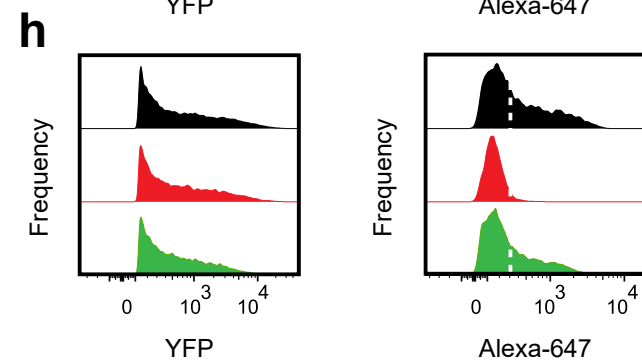

Supplement: supp [file elife_poa_e49253_Figure_3_figure_supplement_1.pdf › elife_poa_e49253_Figure_3_figure_supplement_1.pdf]

**a**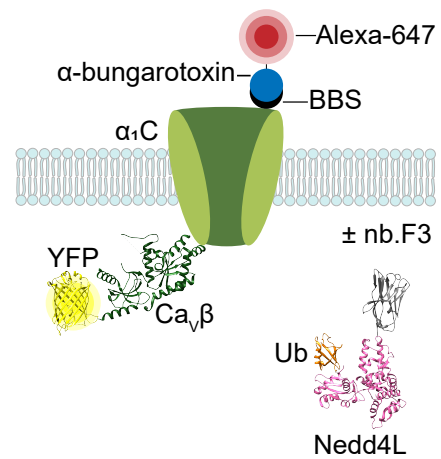**b**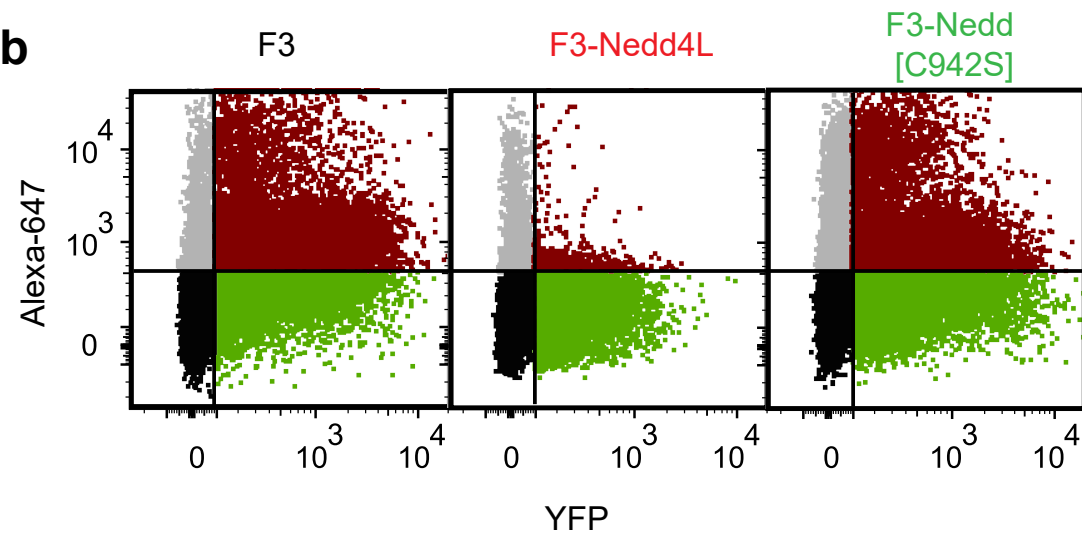**c**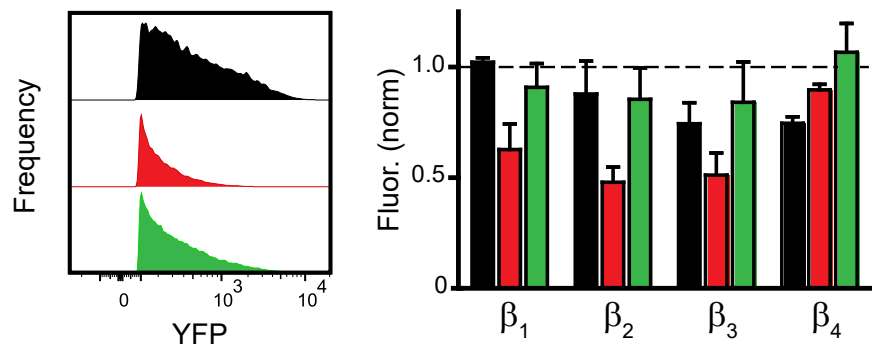**d**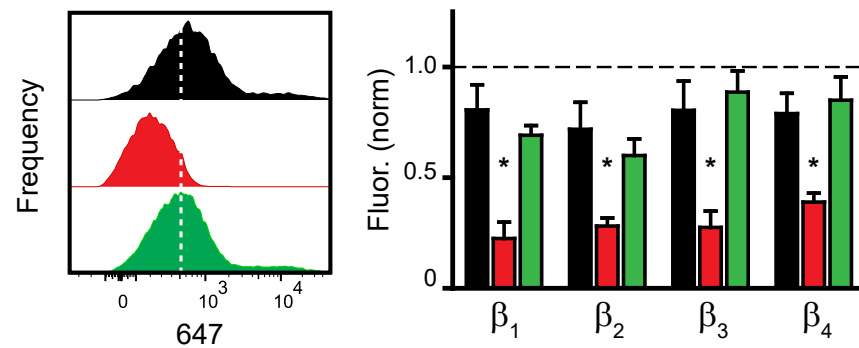

Supplement: supp [file elife_poa_e49253_Figure_3_figure_supplement_2.pdf › elife_poa_e49253_Figure_3_figure_supplement_2.pdf]

**a**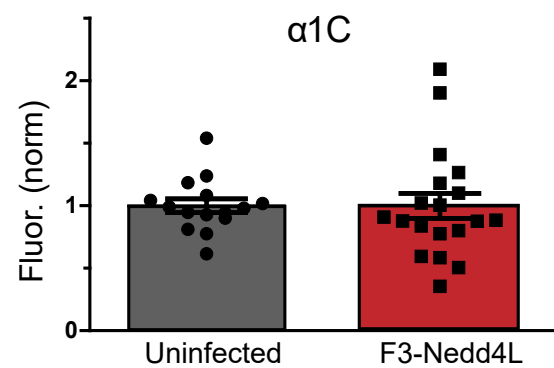**b**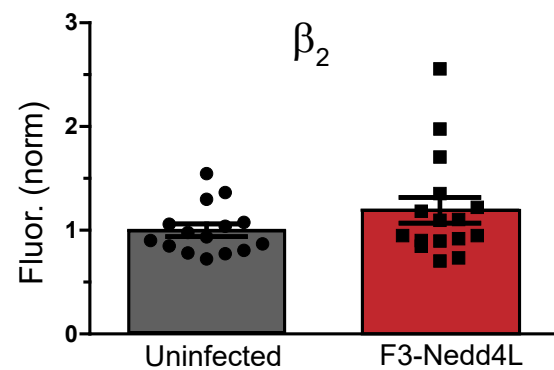**c**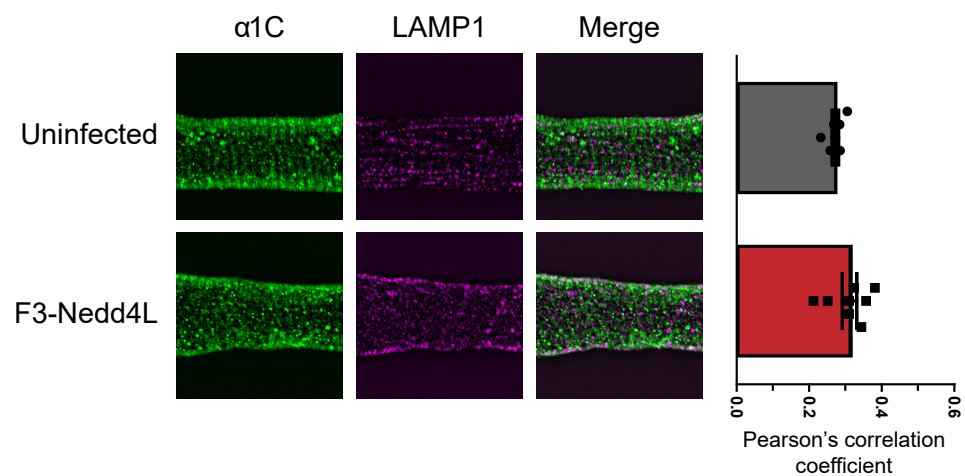**d**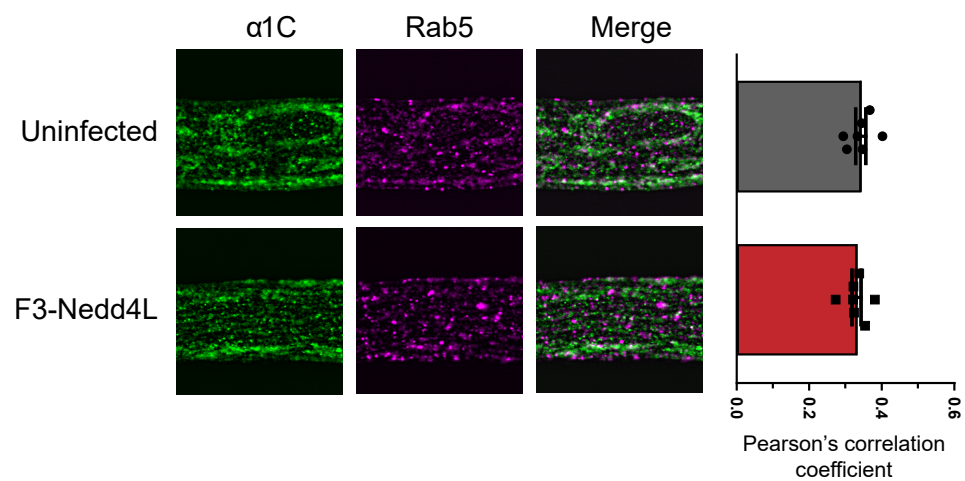

Supplement: supp [file elife_poa_e49253_Figure_5_figure_supplement_1.pdf › elife_poa_e49253_Figure_5_figure_supplement_1.pdf]
